# Supplementary material for: Bta-miR-206 and a Novel lncRNA-lncA2B1 Promote Myogenesis of Skeletal Muscle Satellite Cells via Common Binding Protein HNRNPA2B1
Source: MDPI journal article supplement (doi:10.3390/cells12071028), 2023-03-27
Supplement: s1 [file s1]

## Supplementary

*The sequence of Bta-miR-206*

UGGAAUGUAAGGAAGUGUGUGG

*The sequence of lncA2B1*

GGCAAGAGAAGTAACACATGACATCTTTCTCTCAAATTAAAATGTGACTT-  
GTTTGGCCGGTAGGAACGTAGTGGGAGATGGAAAAGACCGGGAG-  
TCGAAAAGGAAGAGGAGGTGCCAGTATGAA-  
GATGACTCAACAGAAGTAAGGATTCCAGGGCAGTGTGAGATCTGAAAAA-  
GCAATTCCAGTACCAGTTCCTTGTCTCACAGTGGCTTGGCAACTTCAC-  
CTCTCTCAAAGTAGAGAG-  
GAAAATCAAGTCAAACAGGCCTTCCTGAAACATGGCGTGAAACAC-  
CACATGTCACCTTTGTTCCCTGGAGGAGACACTAAACAAGTACTTGTGAGAA-  
GAAGAAATGATCCTGAAGAGAAAGCTGCATAAAGTATTTCTGGTT-  
GAAAAGGCTCTGGAATCAGCGTCTAGAATTTGAATCTCAACTCTGAAGT-  
CATCAGCTGTGTGACCTTAGGAACTCTCGGCTGGATTTGTGACTTGCTTGAA-  
GAAACAGAATGTGATGGATGTGAAGCTGTGTGACTTTTACGCTTTTT-  
GAAACATAATTAAGTCAATGATTTAGAGCATTGCGCAATTTCTAA-  
GAATCCACCTGAAATGCAGAAGACACAGGAAATGTAGGTTT-  
GATCCCTAGGTCAGGAAGACCCCCTGTAGAGGAAATGGCAACACACTCCAG-  
TGTGCTTGCCTGAAAAATCCTGTGGACAAAGGAGCCTAGTGGGC-  
TATGGTCCAAAGGGTTGCAAAGAGTTGGACATGACTGAATAACTGAG-  
CACATGGTGTAAGTGCTGCCAGCATGACTGATTCGAGCTACCAATGTGA-  
TATCACAGAGCATGTAGTTGGAAAGAGATAGCATATATGAC-  
CAATGGGCTCCAGCATACCATCGCTTCCAGACTTACTCCTTAAGA-  
GATCTGTCAGCTTCCATTTTTGCTTTCTTGGAATCCAGTT-  
GACATGAAGGATCCTTGGGCTAGGCTTTTGAATGATGA-  
GAGGCCAAATGGAAAGAAAGGCCATGTGGAAAAGAAAAGAA-  
GCCTTAGGCGATCCATCCCTAGCTGGGCTCCCAGCTGAGTGCAGCTG-  
CATGCTTGGCCTCAGCCAACATTCCATGACATGAAAGACCAC-  
GCAGCCAACCTCACAGAAATGTGAGACACAATACATTGTTGTAGATTAA-  
GCGACTACATTTTGGAAATATTTTAATTAGTCAGCAATAGGTAAGT-  
GAAACATGTATTGCCAAGCCATTGTAAAACAATTTTACATTTTACTCC-  
TATGTTAGCAACGTGGCTCAGCTGGTAAAGAATCTTATCTGCAATGTGGGA-  
GACCTGGGAAGATCCCCTGAAGAAGGGAAAGGCTACCCACTCCAGTATTT-  
GGCCTGGAGAATTCCATGGACTTTATAGTCCGTGGGGTCTCACAGAGTCAGA-  
CATGTCTAAGCAACTTTCACTTTCACTAGCAATGTACAAGAGTGCCTT-  
GTTCTTTGCACATCAGCCTGCACTTTGCATTATCATTACCAGGTTGA-  
TAAGTTAAAAAATGTACTTTGCAGTTTAGCTTGTATTCTTTGAAAATGAATTT-  
GAATAGTTTTTCAGATGCTTATTGGCCATAAATT-  
GGCTGTGCTCTCTGTTTCAATTTTCTCTTGATTTGTAAGGGCTCTTTATATTTTAA-  
TAGGGCTTCTCAGGTGGCTCAATGGTAAGTTATCTGCCTGCAGTGTGGAAGA-  
CACAGGTTTGATACCTGGGTCAGGAATATCGCCTGGAGAAGGAAATGG-  
CAACCCGCTGTAGTATTGTTGCCTGGGAAATACCAAGGACAGAGGAGCCTGG-  
CAGGCTGTAGCCCATGGGATCACAAAATAATCAGACATGACTTAGCGAG-  
TAAACAAAAACAATATAGTTGGTTAACAATTTTGTG-  
TATAGTAACAACAAATGGACAATATTTTGAATGTATGTGGCTACCTAATTT-  
GCTTGTATGTTCTTTGCAGTAAAAAGCTTAAACTATTT-  
GTATGAAAAAATGATGCCTATGGCAGTTTTCTG-  
CAAGTTTCTTATAACATGATCATTTTCAATTTTG
