# Supplementary material for: Bta-miR-206 and a Novel lncRNA-lncA2B1 Promote Myogenesis of Skeletal Muscle Satellite Cells via Common Binding Protein HNRNPA2B1
Source: MDPI journal article supplement (doi:10.3390/cells12071028), 2023-03-27
Supplement: s1 [file s1]

## Supplementary

**Table S1.** The protein-coding potential.

| #ID      | peptide_length | Fickett_score | pI      | ORF_integrity | cod-ing_probability | label     |
|----------|----------------|---------------|---------|---------------|---------------------|-----------|
| LncA2B1  | 46             | 0.3262        | 9.0211  | 1             | 0.0158              | noncoding |
| Linc-MD1 | 99             | 0.3399        | 10.1044 | -1            | 0.1648              | noncoding |
| HPRT1    | 219            | 0.4637        | 6.2108  | 1             | 0.9997              | coding    |

**Table S2.** siRNAs sequences for RNA knockdown.

| Fragment name | Sequences/ (5'→3')  |
|---------------|---------------------|
| si-lncA2B1    | CAACATTCCATGACATGAA |
| si-HNRNPA2B1  | GAGGGATCCTGCAAGCAAA |
| si-DHX9       | GGACCTCAAGAATGAGTTA |

**Table S3.** Primers for PCR.

| Genes                         | Primer sequences/ (5'→3')                                   | Product length |
|-------------------------------|-------------------------------------------------------------|----------------|
| TCONS_00048554<br>(lncA2B1-1) | F: TGTGGCTACCTAATTTGCTTGT<br>R: ACTTGCAGAAAAGTCCCATAGG      | 92 bp          |
| TCONS_00048554<br>(lncA2B1-2) | F: TGTGACTTGTTTGCCGGTA<br>R: TCTTCATACTGGCACCTCCTC          | 84 bp          |
| TCONS_00070803                | F: GAGGCAGGACAACCCATCTT<br>R: GGGACAGTATGAGGTAGGGGAG        | 136 bp         |
| TCONS_00024351                | F: GAGCGAGTACATGGGAGGAA<br>R: TTAGACTCCCCCTCCACACA          | 112 bp         |
| TCONS_00085765                | F: TTCAGTGTAGTCGCTGGCAC<br>R: GCCCCTTCCATCAGCACATT          | 128 bp         |
| TCONS_00109062                | F: CTTCTCTCCTACTTCACAGCCC<br>R: GAGAAGGCAAATGGGGTCAG        | 90 bp          |
| TCONS_00042276                | F: CAAGGGGTCACGATGTCTCA<br>R: GGAGAAACCACCGACCAACC          | 107 bp         |
| Pax3                          | F: CAAAAGAGAGAACCCCGGCA<br>R: ACTCACTGAGGGTACGGTGT          | 94 bp          |
| Pax7                          | F: AGCCAGAGTTTCAACGGGAG<br>R: GTCGCCAACAGACAACACAC          | 93 bp          |
| HDAC4                         | F: AAGCCAAATGCTTTCTCTGTCC<br>R: GTGCTGGGCATGTGGTTCAC        | 97 bp          |
| MyoG                          | F: GGCTGACAAATGCCAGACTATCC<br>R: TGGTCCCTTGCTTTATCTCCCT     | 140 bp         |
| MyHC                          | F: CTGGAATCCGGAGGCAGAA<br>R: TTTTCGAAGGTAGGGAGCGG           | 105 bp         |
| GAPDH                         | F: TGTGTGGATCTGACCTGCC<br>R: AAGTCGCAGGAGACAACCTG           | 135 bp         |
| pre-GAPDH                     | F: TCCCTCCACGATGCCAAAG<br>R: GAAGCGGGCTGATAGTGCC            | 143 bp         |
| β-actin                       | F: CATGTACGTTGCTATCCAGGC<br>R: CTCCTTAATGTCACGCACGAT        | 250 bp         |
| U6                            | F: GGAACGATACAGAGAAGATTAGC<br>R: TGGAACGCTTCACGAATTTGCG     | 68 bp          |
| HNRNPA2B1                     | F: ATGGAGGAGGAAGAGGAGGATATGG<br>R: AGTTGTCATAACCACCTCCGTAGC | 84 bp          |
| DHX9                          | F: TGGAGGCTCTGGTTGTTGAAGT                                   | 90 bp          |

|                          |                                                                                                    |          |
|--------------------------|----------------------------------------------------------------------------------------------------|----------|
|                          | R: GGCGGATTGTGTTTCAGCATACG                                                                         |          |
| bta-miR-206 <sup>a</sup> | F: CGTGGAATGTAAGGAAGTGTGTGG                                                                        |          |
| 5.8s-rRNA <sup>a</sup>   | F: GACTATGCCTGTCTGAGCGTCACTT                                                                       |          |
| LncA2B1 (52–269bp)       | F1: TTTGGCCGGTAGGAACGTAG<br>R1: TGTGGTGTTCACGCCATGT                                                | 237 bp   |
| LncA2B1(141–394bp)       | F2: TAAGGATTCCAGGGCAGTGT<br>R2: CAGAGCCTTTTCAACCAGGAA                                              | 254 bp   |
| LncA2B1 (375–878bp)      | F3: TCCTGGTTGAAAAGGCTCTGG<br>R3: GGAAGCGATGGTATGCTGGA                                              | 504 bp   |
| LncA2B1 (202–2005bp)     | F4: CAGTGGCTTGGCAACTTCAC<br>R4: GCAGAAAAGTCCCATAGGCATC                                             | 1,804 bp |
| LncA2B1 (104–2005bp)     | F5: GAAGAGGAGGTGCCAGTATGA<br>R5: GCAACTTGCAGAAAAGTCCCATAGG                                         | 1,902 bp |
| LncA2B1 Sense            | F:TAATACGACTCACTATAGGGGGCAAGAGAAAG<br>TAACACATGACATCTTTCT                                          | 2,033 bp |
| LncA2B1 anti-Sense       | R:CAAAAATTGAAAATGATCATGTTATAAGAAACT<br>F:TAATACGACTCACTATAGGGCAAAAATTGAAAA<br>TGATCATGTTATAAGAAACT | 2,033 bp |
|                          | R: GGCAAGAGAAGTAACACATGACATCTTTCT                                                                  |          |

<sup>a</sup> Sense primers for mature miRNAs and 5.8 s rRNA RT-qPCR are provided here; GeneCopoeia were provided anti-sense primers as a Universal Adaptor PCR Primer.

**Table S4.** The primer sequences of gene cloning.

| Genes      | Primer sequences/ (5'→3')                            | Sites |
|------------|------------------------------------------------------|-------|
| pET-       | F: CCGGAATTCGAAGAGGAGGTGCCAGTATGAA                   | EcoRI |
| lncA2B1    | R: CCGCTCGAGCGCTGATTCCAGAGCCTTTTC                    | XhoI  |
| pcDNA3.1-  | F: CCGCTCGAGGGCAAGAGAAGTAACACATGACATCTTTCT           | XhoI  |
| lncA2B1    | R: TGCTCTAGACAAAATTGAAAATGATCATGTTATAAGAAACT         | XbaI  |
| psicheck2- | F: CCGCTCGAGGGCAAGAGAAGTAACACATGACATCTTTCT           | XhoI  |
| lncA2B1    | R: ATTTGCGGCCGCCAAAATTGAAAATGATCATGTTATAA-<br>GAAACT | NotI  |

**Table S5.** The antibody information.

| Name                                       | Dilution | Manufacturer    |
|--------------------------------------------|----------|-----------------|
| Myosin heavy chain (MyHC)                  | 1:100    | DSHB, USA       |
| Myogenin                                   | 1:500    |                 |
| GAPDH                                      | 1:1,000  | ZSGB-BIO, China |
| HRP Goat anti-mouse IgG                    | 1:20,000 |                 |
| HRP Goat anti-rabbit IgG                   | 1:20,000 |                 |
| Anti-PAX7 Antibody                         | 1:1,000  | Bioss, China    |
| Anti-HDAC4 antibody                        | 1:1,000  |                 |
| Anti-Myosin VIIa                           | 1:500    | abcam, USA      |
| Anti-HNRNPA2B1 rabbit polyclonal anti-body | 1:500    | BBI, China      |
| Anti-DHX9 Antibody                         | 1:100    | BOSTER, China   |
